# Supplementary material
Source: MDPI journal article supplement (https://www.mdpi.com/2071-1050/14/4/2005)
Supplement: s1 [file s1]

## Supporting Information:

Mousavi, H.; Cottis, T.; Hoff, G.; Solberg, S.Ø. Nitrogen Enriched Organic Fertilizer (NEO) and its Effect on Ryegrass Yield and Soil Fauna Feeding Activity under Controlled Conditions.

**Table S1.** Effects of different fertilizing regimes including different amounts of mineral fertilizer, three types of NEO, organic fertilizer (untreated cattle slurry), organic fertilizer + different amounts of mineral fertilizer (MF), and no fertilizer on ryegrass dry matter yields (g) in trial one, and trial two, soil fauna feeding activity (%) in the early effects in trial one, and trial two, and in the late effects in trial one, and the depth of feeding activity (%) in the short term in trial one, and trial two, and in long term trial one, respectively. Games-Howell pairwise comparison method at 95% confidence interval is used to compare the differences between means. Means that do not share a letter are significantly different.

| Ryegrass dry matter yields in trial one | Yield (g) | Grouping |
|-----------------------------------------|-----------|----------|
| Mineral fertilizer 235 kg N ha-1        | 16.9      | A        |
| Mineral fertilizer 175 kg N ha-1        | 14.9      | AB       |
| NEO type B 175.4 kg N ha-1              | 14.2      | AB       |
| NEO type C 175.4 kg N ha-1              | 14.1      | AB       |
| Mineral fertilizer 205 kg N ha-1        | 14        | AB       |
| Organic fertilizer + MF 175 kg N ha-1   | 13.4      | AB       |
| Organic fertilizer + MF 205 kg N ha-1   | 13.3      | AB       |
| NEO type A 175.4 kg N ha-1              | 13.1      | AB       |
| Mineral fertilizer 145 kg N ha-1        | 12.8      | AB       |
| Organic fertilizer + MF 145 kg N ha-1   | 12.7      | AB       |
| Organic fertilizer + MF 115 kg N ha-1   | 11.9      | B        |
| Mineral fertilizer 115 kg N ha-1        | 11.6      | B        |
| Organic fertilizer 73 kg N ha-1         | 9.1       | B        |
| No fertilizer                           | 3.2       | C        |
| Ryegrass dry matter yields in trial two | Yield (g) | Grouping |
| Mineral fertilizer 175 kg N ha-1        | 14.1      | A        |
| Mineral fertilizer 155 kg N ha-1        | 13.8      | A        |
| NEO type A 175.4 kg N ha-1              | 13.4      | A        |
| NEO type C 175.4 kg N ha-1              | 13.2      | A        |
| Mineral fertilizer 135 kg N ha-1        | 13.1      | A        |
| Mineral fertilizer 115 kg N ha-1        | 12.4      | A        |
| NEO type B 175.4 kg N ha-1              | 11.9      | AB       |
| Mineral fertilizer 80 kg N ha-1         | 10.6      | B        |

|                                                                |                             |                 |
|----------------------------------------------------------------|-----------------------------|-----------------|
| Organic fertilizer 73 kg N ha-1                                | 10.3                        | BC              |
| Mineral fertilizer 60 kg N ha-1                                | 9.1                         | C               |
| No fertilizer                                                  | 2.7                         | D               |
| <b>Soil fauna feeding activity, early effects in trial one</b> | <b>Feeding activity (%)</b> | <b>Grouping</b> |
| Mineral fertilizer 205 kg N ha-1                               | 48.4                        | A               |
| Mineral fertilizer 175 kg N ha-1                               | 46                          | AB              |
| No fertilizer                                                  | 40.6                        | AB              |
| Organic fertilizer 73 kg N ha-1                                | 39.1                        | AB              |
| Organic fertilizer + MF 205 kg N ha-1                          | 37.2                        | AB              |
| Organic fertilizer + MF 145 kg N ha-1                          | 34.6                        | AB              |
| Mineral fertilizer 145 kg N ha-1                               | 33.1                        | AB              |
| Organic fertilizer + MF 115 kg N ha-1                          | 32.2                        | AB              |
| Mineral fertilizer 235 kg N ha-1                               | 28.1                        | AB              |
| Organic fertilizer + MF 175 kg N ha-1                          | 25.2                        | AB              |
| NEO type A 175.4 kg N ha-1                                     | 22.6                        | AB              |
| Mineral fertilizer 115 kg N ha-1                               | 21.6                        | B               |
| NEO type B 175.4 kg N ha-1                                     | 20.3                        | B               |
| NEO type C 175.4 kg N ha-1                                     | 19.2                        | B               |
| <b>Soil fauna feeding activity, early effects in trial two</b> | <b>Feeding activity (%)</b> | <b>Grouping</b> |
| No fertilizer                                                  | 48.7                        | A               |
| Mineral fertilizer 60 kg N ha-1                                | 48.7                        | A               |
| NEO type B 175 kg N ha-1                                       | 46.3                        | A               |
| NEO type A 175 kg N ha-1                                       | 42.7                        | AB              |
| Mineral fertilizer 80 kg N ha-1                                | 41.9                        | AB              |
| Mineral fertilizer 135 kg N ha-1                               | 40.1                        | AB              |
| NEO type C 175 kg N ha-1                                       | 38.8                        | AB              |
| Organic fertilizer 73 kg N ha-1                                | 37.5                        | AB              |
| Mineral fertilizer 115 kg N ha-1                               | 36.7                        | AB              |
| Mineral fertilizer 155 kg N ha-1                               | 26.8                        | AB              |
| Mineral fertilizer 175 kg N ha-1                               | 13.8                        | B               |
| <b>Soil fauna feeding activity, late effects in trial one</b>  | <b>Feeding activity (%)</b> | <b>Grouping</b> |

|                                                              |                             |                 |
|--------------------------------------------------------------|-----------------------------|-----------------|
| Mineral fertilizer 205 kg N ha-1                             | 69.7                        | A               |
| Mineral fertilizer 175 kg N ha-1                             | 69                          | AB              |
| No fertilizer                                                | 68.7                        | ABC             |
| Mineral fertilizer 145 kg N ha-1                             | 59.9                        | ABCD            |
| Mineral fertilizer 115 kg N ha-1                             | 55.4                        | ABCD            |
| Mineral fertilizer 235 kg N ha-1                             | 53.1                        | ABCD            |
| NEO type C 175.4 kg N ha-1                                   | 42.1                        | BCD             |
| NEO type B 175.4 kg N ha-1                                   | 41.9                        | BCD             |
| Organic fertilizer + MF 115 kg N ha-1                        | 41.4                        | BCD             |
| Organic fertilizer + MF 175 kg N ha-1                        | 41.4                        | BCD             |
| Organic fertilizer 73 kg N ha-1                              | 36.7                        | CD              |
| Organic fertilizer + MF 145 kg N ha-1                        | 35.9                        | CD              |
| NEO type A 175.4 kg N ha-1                                   | 34.3                        | D               |
| Organic fertilizer + MF 205 kg N ha-1                        | 30.1                        | D               |
| <b>Depth of feeding activity, early effects in trial one</b> | <b>Feeding activity (%)</b> | <b>Grouping</b> |
| 8 cm                                                         | 43                          | A               |
| 6.5 cm                                                       | 39                          | AB              |
| 7.5 cm                                                       | 37                          | ABC             |
| 7 cm                                                         | 36                          | ABC             |
| 5.5 cm                                                       | 35                          | ABC             |
| 6 cm                                                         | 32                          | ABC             |
| 0.5 cm                                                       | 31                          | ABC             |
| 1 cm                                                         | 31                          | ABC             |
| 3 cm                                                         | 30                          | ABC             |
| 1.5 cm                                                       | 30                          | ABC             |
| 5 cm                                                         | 29                          | ABC             |
| 3.5 cm                                                       | 29                          | ABC             |
| 2.5 cm                                                       | 29                          | ABC             |
| 4 cm                                                         | 26                          | BC              |
| 4.5 cm                                                       | 25                          | BC              |
| 2 cm                                                         | 23                          | C               |

| Depth of feeding activity, early effects in trial two | Feeding activity (%) | Grouping |
|-------------------------------------------------------|----------------------|----------|
| 5.5 cm                                                | 43                   | A        |
| 7 cm                                                  | 42                   | A        |
| 4.5 cm                                                | 42                   | A        |
| 6 cm                                                  | 41                   | A        |
| 8 cm                                                  | 41                   | A        |
| 6.5 cm                                                | 41                   | A        |
| 4 cm                                                  | 40                   | A        |
| 5 cm                                                  | 39                   | A        |
| 7.5 cm                                                | 38                   | A        |
| 0.5 cm                                                | 38                   | A        |
| 3.5 cm                                                | 37                   | A        |
| 3 cm                                                  | 37                   | A        |
| 2.5 cm                                                | 36                   | A        |
| 1 cm                                                  | 36                   | A        |
| 2 cm                                                  | 28                   | A        |
| 1.5 cm                                                | 28                   | A        |
| Depth of feeding activity, late effects in trial one  | Feeding activity (%) | Grouping |
| 7 cm                                                  | 55                   | A        |
| 8 cm                                                  | 53                   | A        |
| 6.5 cm                                                | 53                   | A        |
| 7.5 cm                                                | 51                   | A        |
| 6 cm                                                  | 51                   | A        |
| 2.5 cm                                                | 48                   | A        |
| 5 cm                                                  | 48                   | A        |
| 3.5 cm                                                | 48                   | A        |
| 4.5 cm                                                | 47                   | A        |
| 1 cm                                                  | 47                   | A        |
| 5.5 cm                                                | 46                   | A        |
| 1.5 cm                                                | 46                   | A        |
| 0.5 cm                                                | 45                   | A        |

|      |    |   |
|------|----|---|
| 3 cm | 45 | A |
| 2 cm | 44 | A |
| 4 cm | 43 | A |
